# Supplementary material
Source: PubMed Central journal article supplement (PMC3581251)
Supplement: Supp_Data.pdf [file Supp_Data.pdf]

# Alignment-Free Sequence Comparison Based on Next Generation Sequencing Reads: Supplementary Materials

Kai Song<sup>1</sup>, Jie Ren<sup>1</sup>, Zhiyuan Zhai<sup>2</sup>, Xuemei Liu<sup>3</sup>, Minghua Deng<sup>1\*</sup>, and Fengzhu Sun<sup>4,5\*</sup>

<sup>1</sup> School of Mathematics, Peking University, Beijing, PR China

<sup>2</sup> School of Mathematics, Shandong University, PR China

<sup>3</sup> School of Physics, South China University of Technology, Guangzhou, PR China

<sup>4</sup> TNLIST/Department of Automation, Tsinghua University, Beijing, PR China

<sup>5</sup> Molecular and Computational Biology Program, University of Southern California, Los Angeles, California, USA.

\*Corresponding authors (dengmh@pku.edu.cn, fsun@usc.edu)

## Proofs of the Propositions and Theorems

In this section, we give proofs for Propositions 1-2 and Theorems 1-5. First, we present a method for the calculation of  $\mathbf{E}_{\beta,\eta}(\mathbf{u}, \mathbf{v})$ .

**1).** For the calculation of  $\mathbf{E}_{\beta,0}(\mathbf{u}, \mathbf{v}) = \mathbf{E}(X_{\mathbf{u}}[1, \beta]X_{\mathbf{v}}[1, \beta])$ , we first define  $I_t(\mathbf{u}) = I(A_t A_{t+1} \cdots A_{t+k-1} = \mathbf{u})$ . Then we have

$$\begin{aligned}
 \mathbf{E}\left(X_{\mathbf{u}}[1, \beta]X_{\mathbf{v}}[1, \beta]\right) &= \mathbf{E}\left(\sum_{i=1}^{\beta-k+1} (I_i(\mathbf{u}) + I_i(\bar{\mathbf{u}})) \sum_{j=1}^{\beta-k+1} (I_j(\mathbf{v}) + I_j(\bar{\mathbf{v}}))\right) \\
 &= \sum_{i=1}^{\beta-k+1} \sum_{j=1}^{\beta-k+1} \mathbf{E}\left(I_i(\mathbf{u})I_j(\mathbf{v}) + I_i(\mathbf{u})I_j(\bar{\mathbf{v}}) + I_i(\bar{\mathbf{u}})I_j(\mathbf{v}) + I_i(\bar{\mathbf{u}})I_j(\bar{\mathbf{v}})\right) \\
 &= (\beta - k + 1) \left( \beta_{\mathbf{u},\mathbf{v}}(0)P(\mathbf{u}_0\mathbf{v}) + \beta_{\mathbf{u},\bar{\mathbf{v}}}(0)P(\mathbf{u}_0\bar{\mathbf{v}}) + \beta_{\bar{\mathbf{u}},\mathbf{v}}(0)P(\bar{\mathbf{u}}_0\mathbf{v}) + \beta_{\bar{\mathbf{u}},\bar{\mathbf{v}}}(0)P(\bar{\mathbf{u}}_0\bar{\mathbf{v}}) \right) \\
 &+ \sum_{j=1}^{k-1} (\beta - k - j + 1) \left( \beta_{\mathbf{u},\mathbf{v}}(j)P(\mathbf{u}_j\mathbf{v}) + \beta_{\mathbf{u},\bar{\mathbf{v}}}(j)P(\mathbf{u}_j\bar{\mathbf{v}}) + \beta_{\bar{\mathbf{u}},\mathbf{v}}(j)P(\bar{\mathbf{u}}_j\mathbf{v}) + \beta_{\bar{\mathbf{u}},\bar{\mathbf{v}}}(j)P(\bar{\mathbf{u}}_j\bar{\mathbf{v}}) \right) \\
 &+ \sum_{j=1}^{k-1} (\beta - k - j + 1) \left( \beta_{\mathbf{v},\mathbf{u}}(j)P(\mathbf{v}_j\mathbf{u}) + \beta_{\mathbf{v},\bar{\mathbf{u}}}(j)P(\mathbf{v}_j\bar{\mathbf{u}}) + \beta_{\bar{\mathbf{v}},\mathbf{u}}(j)P(\bar{\mathbf{v}}_j\mathbf{u}) + \beta_{\bar{\mathbf{v}},\bar{\mathbf{u}}}(j)P(\bar{\mathbf{v}}_j\bar{\mathbf{u}}) \right) \\
 &+ \sum_{j=0}^{\beta-2k} (\beta - 2k - j + 1) \left( \mathbf{E}I_1(\mathbf{u})I_{k+1+j}(\mathbf{v}) + \mathbf{E}I_1(\mathbf{u})I_{k+1+j}(\bar{\mathbf{v}}) + \mathbf{E}I_1(\bar{\mathbf{u}})I_{k+1+j}(\mathbf{v}) + \mathbf{E}I_1(\bar{\mathbf{u}})I_{k+1+j}(\bar{\mathbf{v}}) \right) \\
 &+ \sum_{j=0}^{\beta-2k} (\beta - 2k - j + 1) \left( \mathbf{E}I_1(\mathbf{v})I_{k+1+j}(\mathbf{u}) + \mathbf{E}I_1(\mathbf{v})I_{k+1+j}(\bar{\mathbf{u}}) + \mathbf{E}I_1(\bar{\mathbf{v}})I_{k+1+j}(\mathbf{u}) + \mathbf{E}I_1(\bar{\mathbf{v}})I_{k+1+j}(\bar{\mathbf{u}}) \right),
 \end{aligned}$$

where  $\mathbf{u}_j\mathbf{v} = \mathbf{u}_1 \cdots \mathbf{u}_j\mathbf{v}_1 \cdots \mathbf{v}_k$ .

2). For  $0 \leq \eta \leq \beta - 1$ , we have

$$\begin{aligned}
\mathbf{E}_{\beta,\eta}(\mathbf{u}, \mathbf{v}) &= \mathbf{E}_{\beta-\eta,0}(\mathbf{u}, \mathbf{v}) \\
&+ \sum_{j=1}^{k-1} \left( \eta - (\eta - j + 1) \vee 1 + 1 \right) \left( \beta_{\mathbf{u},\mathbf{v}}(l)P(\mathbf{u}_j\mathbf{v}) + \beta_{\mathbf{u},\bar{\mathbf{v}}}(l)P(\mathbf{u}_j\bar{\mathbf{v}}) + \beta_{\bar{\mathbf{u}},\mathbf{v}}(l)P(\bar{\mathbf{u}}_j\mathbf{v}) + \beta_{\bar{\mathbf{u}},\bar{\mathbf{v}}}(l)P(\bar{\mathbf{u}}_j\bar{\mathbf{v}}) \right) \\
&+ \sum_{j=1}^{k-1} \left( (\beta - \eta - k - j + 1) \wedge (\beta - k + 1) - (\beta - k + 2 - j) \vee (\eta + 1) + 1 \right) \left( \beta_{\mathbf{u},\mathbf{v}}(l)P(\mathbf{u}_j\mathbf{v}) \right. \\
&+ \beta_{\mathbf{u},\bar{\mathbf{v}}}(l)P(\mathbf{u}_j\bar{\mathbf{v}}) + \beta_{\bar{\mathbf{u}},\mathbf{v}}(l)P(\bar{\mathbf{u}}_j\mathbf{v}) + \beta_{\bar{\mathbf{u}},\bar{\mathbf{v}}}(l)P(\bar{\mathbf{u}}_j\bar{\mathbf{v}}) \left. \right) \\
&+ \sum_{j=0}^{\beta+\eta-2k} h_j \left( \mathbf{E}I_1(\mathbf{u})I_{k+1+j}(\mathbf{v}) + \mathbf{E}I_1(\mathbf{u})I_{k+1+j}(\bar{\mathbf{v}}) + \mathbf{E}I_1(\bar{\mathbf{u}})I_{k+1+j}(\mathbf{v}) + \mathbf{E}I_1(\bar{\mathbf{u}})I_{k+1+j}(\bar{\mathbf{v}}) \right) \\
&+ \sum_{j=0}^{\beta-2k} (R(j) - L(j) + 1) \left( \mathbf{E}I_1(\mathbf{u})I_{k+1+j}(\mathbf{v}) + \mathbf{E}I_1(\mathbf{u})I_{k+1+j}(\bar{\mathbf{v}}) + \mathbf{E}I_1(\bar{\mathbf{u}})I_{k+1+j}(\mathbf{v}) + \mathbf{E}I_1(\bar{\mathbf{u}})I_{k+1+j}(\bar{\mathbf{v}}) \right),
\end{aligned}$$

where the summations are 0 when the upper limit is smaller than the lower limit,

$$h_j = \begin{cases} j + k, & 0 \leq j \leq \eta - k; \\ \eta, & \eta - k < j \leq \beta - 2k + 1; \\ \beta + \eta - 2k - j + 1, & \beta - 2k + 1 < j \leq \beta + \eta - 2k, \end{cases}$$

and we use the abbreviation  $L(j) = (\beta - 2k - j + 2) \vee (\eta + 1)$  and  $R(j) = (\beta - k + 1) \wedge (\eta + \beta - 2k - j + 1)$ . The  $\beta_{\mathbf{u},\mathbf{v}}(l)$  is the overlap bit which equals 1 if  $\mathbf{u}_{l+i} = \mathbf{v}_i, i = 1, 2, \dots, k - l$ , and  $\beta_{\mathbf{u},\mathbf{v}}(l) = 0$  otherwise.

3). For  $\eta \geq \beta$ , we have

$$\mathbf{E}_{\beta,\eta}(\mathbf{u}, \mathbf{v}) = \sum_{j=\eta-\beta}^{\eta+\beta-2k} f_\eta(j) \left( \mathbf{E}I_1(\mathbf{u})I_{k+1+j}(\mathbf{v}) + \mathbf{E}I_1(\mathbf{u})I_{k+1+j}(\bar{\mathbf{v}}) + \mathbf{E}I_1(\bar{\mathbf{u}})I_{k+1+j}(\mathbf{v}) + \mathbf{E}I_1(\bar{\mathbf{u}})I_{k+1+j}(\bar{\mathbf{v}}) \right),$$

where  $f_\eta(j) = (\beta + j + 1) \wedge (\eta + \beta - k + 1) - j - k - (\eta + 1 - j - k) \vee 1 + 1$ .

### Proof of Proposition 1:

For the calculation of the covariance of  $X_{\mathbf{u}}$  and  $X_{\mathbf{v}}$ , we have

$$\begin{aligned}
\text{Cov}(X_{\mathbf{u}}, X_{\mathbf{v}}) &= \left( M + M(M - 1) \sum_{i=1}^{n-\beta+1} \lambda_i^2 \right) \left( \mathbf{E}_{\beta,0}(\mathbf{u}, \mathbf{v}) - (\beta - k + 1)^2 (P(\mathbf{u}) + P(\bar{\mathbf{u}}))(P(\mathbf{v}) + P(\bar{\mathbf{v}})) \right) \\
&+ M(M - 1) \sum_{i=1}^{n-\beta+1} \lambda_i \sum_{\eta=1}^{n-i-\beta+1} \lambda_{i+\eta} \left( \mathbf{E}_{\beta,\eta}(\mathbf{u}, \mathbf{v}) + \mathbf{E}_{\beta,\eta}(\mathbf{v}, \mathbf{u}) - 2(\beta - k + 1)^2 (P(\mathbf{u}) + P(\bar{\mathbf{u}}))(P(\mathbf{v}) + P(\bar{\mathbf{v}})) \right).
\end{aligned}$$

So if  $\lim_{n \rightarrow \infty} (n - \beta - \eta + 1) \sum_{i=1}^{n-\beta-\eta+1} \lambda_i \lambda_{i+\eta} = r_\eta$  and  $M$  depends on  $n$  such that  $\lim_{n \rightarrow \infty} M/n = \theta$ , then

$$\begin{aligned}
&\lim_{n \rightarrow \infty} \frac{\text{Cov}(X_{\mathbf{u}}, X_{\mathbf{v}})}{M} \\
&= (1 + \theta r_0) \left( \mathbf{E}_{\beta,0}(\mathbf{u}, \mathbf{v}) - (\beta - k + 1)^2 (P(\mathbf{u}) + P(\bar{\mathbf{u}}))(P(\mathbf{v}) + P(\bar{\mathbf{v}})) \right) \\
&+ \theta \sum_{\eta=1}^{\infty} r_\eta \left( \mathbf{E}_{\beta,\eta}(\mathbf{u}, \mathbf{v}) + \mathbf{E}_{\beta,\eta}(\mathbf{v}, \mathbf{u}) - 2(\beta - k + 1)^2 (P(\mathbf{u}) + P(\bar{\mathbf{u}}))(P(\mathbf{v}) + P(\bar{\mathbf{v}})) \right).
\end{aligned} \tag{1}$$

**Proposition 2** can be proved easily by the Central Limit Theorem.

**Proof of Theorem 1:**

It is obvious that a word pattern  $\mathbf{w}$  occurs in a read or its complement if and only  $\mathbf{w}$  or  $\bar{\mathbf{w}}$  occurs in the read from the forward strand. So we have  $\mathbf{E}X_{\mathbf{w}} = M(\beta - k + 1)(P_{\rho}(\mathbf{w}) + P_{\rho}(\bar{\mathbf{w}}))$ .

$$\mathbf{E}D_2 = \sum \mathbf{E}X_{\mathbf{w}}\mathbf{E}Y_{\mathbf{w}} = M^2(\beta - k + 1)^2 \sum (P_{\rho}(\mathbf{w}) + P_{\rho}(\bar{\mathbf{w}}))^2,$$

Also we have  $\mathbf{E}\tilde{X}_{\mathbf{w}} = M(\beta - k + 1)(P_{\rho}(\mathbf{w}) + P_{\rho}(\bar{\mathbf{w}}) - p_{\mathbf{w}} - p_{\bar{\mathbf{w}}})$ . Thus,

$$\mathbf{E}D_2^* = \sum \frac{\mathbf{E}\tilde{X}_{\mathbf{w}}\mathbf{E}\tilde{Y}_{\mathbf{w}}}{M(\beta - k + 1)(p_{\mathbf{w}} + p_{\bar{\mathbf{w}}})} = M(\beta - k + 1) \sum \frac{(P_{\rho}(\mathbf{w}) + P_{\rho}(\bar{\mathbf{w}}) - p_{\mathbf{w}} - p_{\bar{\mathbf{w}}})^2}{p_{\mathbf{w}} + p_{\bar{\mathbf{w}}}}.$$

For the proof of the approximate mean of  $D_2^S$ , we first use the Taylor expansion,

$$\frac{(x+a)(y+a)}{\sqrt{(x+a)^2 + (y+a)^2}} = \frac{|a|}{\sqrt{2}} + \frac{\text{sign}(a)}{2\sqrt{2}}(x+y) + O(x^2 + y^2).$$

For each  $\mathbf{w}$ , let  $a = (\beta - k + 1)(P_{\rho}(\mathbf{w}) + P_{\rho}(\bar{\mathbf{w}}) - p_{\mathbf{w}} - p_{\bar{\mathbf{w}}})$ ,  $x = X_{\mathbf{w}}/M - (\beta - k + 1)(P_{\rho}(\mathbf{w}) + P_{\rho}(\bar{\mathbf{w}}))$ , and  $y = Y_{\mathbf{w}}/M - (\beta - k + 1)(P_{\rho}(\mathbf{w}) + P_{\rho}(\bar{\mathbf{w}}))$ . Then with the Taylor expansion,

$$\begin{aligned} \frac{\tilde{X}_{\mathbf{w}}\tilde{Y}_{\mathbf{w}}}{M\sqrt{\tilde{X}_{\mathbf{w}}^2 + \tilde{Y}_{\mathbf{w}}^2}} &= \frac{(\beta - k + 1)}{\sqrt{2}} |(P_{\rho}(\mathbf{w}) + P_{\rho}(\bar{\mathbf{w}}) - p_{\mathbf{w}} - p_{\bar{\mathbf{w}}})| \\ &+ \frac{(\beta - k + 1)\text{sign}(P_{\rho}(\mathbf{w}) + P_{\rho}(\bar{\mathbf{w}}) - p_{\mathbf{w}} - p_{\bar{\mathbf{w}}})}{2\sqrt{2}} \left( \frac{X_{\mathbf{w}} + Y_{\mathbf{w}}}{M} - 2(\beta - k + 1)(P_{\rho}(\mathbf{w}) + P_{\rho}(\bar{\mathbf{w}})) \right) \\ &+ O\left( (X_{\mathbf{w}}/M - (\beta - k + 1)(P_{\rho}(\mathbf{w}) + P_{\rho}(\bar{\mathbf{w}})))^2 + (Y_{\mathbf{w}}/M - (\beta - k + 1)(P_{\rho}(\mathbf{w}) + P_{\rho}(\bar{\mathbf{w}})))^2 \right). \end{aligned}$$

Taking expectation, we have

$$\lim_{n \rightarrow \infty} \frac{\mathbf{E}D_2^S}{M} = \frac{\beta - k + 1}{\sqrt{2}} \sum |(P_{\rho}(\mathbf{w}) + P_{\rho}(\bar{\mathbf{w}})) - (p_{\mathbf{w}} + p_{\bar{\mathbf{w}}})|.$$

Further, we refine the Taylor expansion to

$$\frac{(x+a)(y+a)}{\sqrt{(x+a)^2 + (y+a)^2}} = \frac{|a|}{\sqrt{2}} + \frac{\text{sign}(a)}{2\sqrt{2}}(x+y) - \frac{3}{8\sqrt{2}|a|}(x-y)^2.$$

Thus, we have

$$\lim_{n \rightarrow \infty} M \left( \frac{\mathbf{E}D_2^S}{M} - \frac{\beta - k + 1}{\sqrt{2}} \sum |(P_{\rho}(\mathbf{w}) + P_{\rho}(\bar{\mathbf{w}})) - (p_{\mathbf{w}} + p_{\bar{\mathbf{w}}})| \right) = -\frac{3\sqrt{2}}{8(\beta - k + 1)} \sum \frac{\sigma_{\rho}^2(\mathbf{w})}{|(P_{\rho}(\mathbf{w}) + P_{\rho}(\bar{\mathbf{w}})) - (p_{\mathbf{w}} + p_{\bar{\mathbf{w}}})|}.$$

**Proof of Theorem 2:**

From the definition of  $D_2$ , we have

$$\begin{aligned} \frac{D_2}{M^2} &= \sum \frac{X_{\mathbf{w}}}{M} \frac{Y_{\mathbf{w}}}{M} = \sum \left( \frac{X_{\mathbf{w}}}{M} - (\beta - k + 1)(P_{\rho}(\mathbf{w}) + P_{\rho}(\bar{\mathbf{w}})) + (\beta - k + 1)(P_{\rho}(\mathbf{w}) + P_{\rho}(\bar{\mathbf{w}})) \right) \\ &\quad \left( \frac{Y_{\mathbf{w}}}{M} - (\beta - k + 1)(P_{\rho}(\mathbf{w}) + P_{\rho}(\bar{\mathbf{w}})) + (\beta - k + 1)(P_{\rho}(\mathbf{w}) + P_{\rho}(\bar{\mathbf{w}})) \right) \\ &= \sum \left( \frac{X_{\mathbf{w}}}{M} - (\beta - k + 1)(P_{\rho}(\mathbf{w}) + P_{\rho}(\bar{\mathbf{w}})) \right) \left( \frac{Y_{\mathbf{w}}}{M} - (\beta - k + 1)(P_{\rho}(\mathbf{w}) + P_{\rho}(\bar{\mathbf{w}})) \right) \\ &\quad + (\beta - k + 1) \sum (P_{\rho}(\mathbf{w}) + P_{\rho}(\bar{\mathbf{w}})) \left( \frac{X_{\mathbf{w}}}{M} - (\beta - k + 1)(P_{\rho}(\mathbf{w}) + P_{\rho}(\bar{\mathbf{w}})) \right) \\ &\quad + (\beta - k + 1) \sum (P_{\rho}(\mathbf{w}) + P_{\rho}(\bar{\mathbf{w}})) \left( \frac{Y_{\mathbf{w}}}{M} - (\beta - k + 1)(P_{\rho}(\mathbf{w}) + P_{\rho}(\bar{\mathbf{w}})) \right) \\ &\quad + (\beta - k + 1)^2 \sum (P_{\rho}(\mathbf{w}) + P_{\rho}(\bar{\mathbf{w}}))^2. \end{aligned}$$

Therefore,

$$\begin{aligned}
& \sqrt{M} \left( \frac{D_2}{M^2} - (\beta - k + 1)^2 \sum (P_\rho(\mathbf{w}) + P_\rho(\bar{\mathbf{w}}))^2 \right) \\
&= \frac{1}{\sqrt{M}} \sum \sqrt{M} \left( \frac{X_{\mathbf{w}}}{M} - (\beta - k + 1)(P_\rho(\mathbf{w}) + P_\rho(\bar{\mathbf{w}})) \right) \sqrt{M} \left( \frac{Y_{\mathbf{w}}}{M} - (\beta - k + 1)(P_\rho(\mathbf{w}) + P_\rho(\bar{\mathbf{w}})) \right) \\
&+ (\beta - k + 1) \sum (P_\rho(\mathbf{w}) + P_\rho(\bar{\mathbf{w}})) \left( \sqrt{M} \left( \frac{X_{\mathbf{w}}}{M} - (\beta - k + 1)(P_\rho(\mathbf{w}) + P_\rho(\bar{\mathbf{w}})) \right) \right) \\
&+ \sqrt{M} \left( \frac{Y_{\mathbf{w}}}{M} - (\beta - k + 1)(P_\rho(\mathbf{w}) + P_\rho(\bar{\mathbf{w}})) \right). \tag{2}
\end{aligned}$$

For  $0 < \rho \leq 1$ , it has been shown in Proposition 2 that in distribution,

$$\lim_{n \rightarrow \infty} \sqrt{M} \left( \frac{X_{\mathbf{w}}}{M} - (\beta - k + 1)(P_\rho(\mathbf{w}) + P_\rho(\bar{\mathbf{w}})) \right) = N(0, \sigma_\rho^2(\mathbf{w})),$$

$$\lim_{n \rightarrow \infty} \sqrt{M} \left( \frac{Y_{\mathbf{w}}}{M} - (\beta - k + 1)(P_\rho(\mathbf{w}) + P_\rho(\bar{\mathbf{w}})) \right) = N(0, \sigma_\rho^2(\mathbf{w})),$$

where  $\sigma_\rho^2(\mathbf{w}) = \lim_{n \rightarrow \infty} \frac{\text{Var}(X_{\mathbf{w}})}{M}$ . Therefore, the first term in (2) tends to 0 when  $M \rightarrow \infty$ . Thus,

$$\left( \sqrt{M} \left( \frac{X_{\mathbf{w}}}{M} - (\beta - k + 1)(P_\rho(\mathbf{w}) + P_\rho(\bar{\mathbf{w}})) \right) + \sqrt{M} \left( \frac{Y_{\mathbf{w}}}{M} - (\beta - k + 1)(P_\rho(\mathbf{w}) + P_\rho(\bar{\mathbf{w}})) \right) \right) \rightarrow N(0, 2\sigma_\rho^2(\mathbf{w})).$$

Let  $\sigma_\rho(\mathbf{w}, \mathbf{w}') = \lim_{n \rightarrow \infty} \frac{\text{Cov}(X_{\mathbf{w}}, X_{\mathbf{w}'})}{M}$  which can be calculated as in (4) in the main text. Since  $\{X_{\mathbf{w}}, \mathbf{w} \in \mathcal{A}^k\}$  and  $\{Y_{\mathbf{w}}, \mathbf{w} \in \mathcal{A}^k\}$  are independent, the second term in equation (2) is asymptotically normal with mean 0 and variance  $2(\Sigma_\rho)^2$ . The first term in equation (2) tends to 0. Theorem 2 is proved.

### Proof of Theorem 3:

a). For the case of  $\rho = 1$ , we have

$$\lim_{n \rightarrow \infty} \sqrt{M} \left( \frac{X_{\mathbf{w}}}{M} - (\beta - k + 1)(p_{\mathbf{w}} + p_{\bar{\mathbf{w}}}) \right) = N(0, \sigma_1^2(\mathbf{w})), \tag{3}$$

$$\lim_{n \rightarrow \infty} \sqrt{M} \left( \frac{X_{\mathbf{w}}}{M} - (\beta - k + 1)(p_{\mathbf{w}} + p_{\bar{\mathbf{w}}}) \right) = N(0, \sigma_1^2(\mathbf{w})). \tag{4}$$

From the definition of  $D_2^*$ , we have

$$\begin{aligned}
\lim_{n \rightarrow \infty} D_2^* &= \lim_{n \rightarrow \infty} \sum \frac{\tilde{X}_{\mathbf{w}} \tilde{Y}_{\mathbf{w}}}{M(\beta - k + 1)(p_{\mathbf{w}} + p_{\bar{\mathbf{w}}})} \\
&= \lim_{n \rightarrow \infty} \sum \frac{(X_{\mathbf{w}} - M(\beta - k + 1)(p_{\mathbf{w}} + p_{\bar{\mathbf{w}}})) (Y_{\mathbf{w}} - M(\beta - k + 1)(p_{\mathbf{w}} + p_{\bar{\mathbf{w}}}))}{M(\beta - k + 1)(p_{\mathbf{w}} + p_{\bar{\mathbf{w}}})} \\
&= \lim_{n \rightarrow \infty} \sum \sqrt{M} \left( \frac{X_{\mathbf{w}}}{M} - (\beta - k + 1)(p_{\mathbf{w}} + p_{\bar{\mathbf{w}}}) \right) \sqrt{M} \left( \frac{Y_{\mathbf{w}}}{M} - (\beta - k + 1)(p_{\mathbf{w}} + p_{\bar{\mathbf{w}}}) \right) / (\beta - k + 1)(p_{\mathbf{w}} + p_{\bar{\mathbf{w}}}) \\
&= \sum \frac{Z_{\mathbf{w}}^{(1)} Z_{\mathbf{w}}^{(2)}}{(\beta - k + 1)(p_{\mathbf{w}} + p_{\bar{\mathbf{w}}})},
\end{aligned}$$

where  $\{Z_{\mathbf{w}}^{(1)}, \mathbf{w} \in \mathcal{A}_k\}$  and  $\{Z_{\mathbf{w}}^{(2)}, \mathbf{w} \in \mathcal{A}_k\}$  are independent and have the same mean 0 normal distribution.

b). To prove the second part, we note that

$$\begin{aligned}
 \frac{D_2^*}{M} &= \sum \frac{\tilde{X}_{\mathbf{w}}\tilde{Y}_{\mathbf{w}}}{M^2(\beta-k+1)(p_{\mathbf{w}}+p_{\bar{\mathbf{w}}})} \\
 &= \sum \frac{1}{(\beta-k+1)(p_{\mathbf{w}}+p_{\bar{\mathbf{w}}})} \left( \frac{X_{\mathbf{w}}}{M} - (\beta-k+1)(P_{\rho}(\mathbf{w})+P_{\rho}(\bar{\mathbf{w}})) \right) \left( \frac{Y_{\mathbf{w}}}{M} - (\beta-k+1)(P_{\rho}(\mathbf{w})+P_{\rho}(\bar{\mathbf{w}})) \right) \\
 &\quad + \sum \frac{(P_{\rho}(\mathbf{w})+P_{\rho}(\bar{\mathbf{w}})-p_{\mathbf{w}}-p_{\bar{\mathbf{w}}})}{p_{\mathbf{w}}+p_{\bar{\mathbf{w}}}} \left( \frac{X_{\mathbf{w}}}{M} - (\beta-k+1)(P_{\rho}(\mathbf{w})+P_{\rho}(\bar{\mathbf{w}})) + \frac{Y_{\mathbf{w}}}{M} - (\beta-k+1)(P_{\rho}(\mathbf{w})+P_{\rho}(\bar{\mathbf{w}})) \right) \\
 &\quad + (\beta-k+1) \sum \frac{(P_{\rho}(\mathbf{w})+P_{\rho}(\bar{\mathbf{w}})-p_{\mathbf{w}}-p_{\bar{\mathbf{w}}})^2}{p_{\mathbf{w}}+p_{\bar{\mathbf{w}}}}.
 \end{aligned}$$

It follows from the normal approximation for individual word counts that in distribution,

$$\lim_{n \rightarrow \infty} \sqrt{M} \sum \frac{1}{p_{\mathbf{w}}+p_{\bar{\mathbf{w}}}} \left( \frac{X_{\mathbf{w}}}{M} - (\beta-k+1)(P_{\rho}(\mathbf{w})+P_{\rho}(\bar{\mathbf{w}})) \right) \left( \frac{Y_{\mathbf{w}}}{M} - (\beta-k+1)(P_{\rho}(\mathbf{w})+P_{\rho}(\bar{\mathbf{w}})) \right) \rightarrow 0.$$

Therefore, in distribution,

$$\begin{aligned}
 &\lim_{n \rightarrow \infty} \sqrt{M} \left( \frac{D_2^*}{M} - (\beta-k+1) \sum \frac{(P_{\rho}(\mathbf{w})+P_{\rho}(\bar{\mathbf{w}})-p_{\mathbf{w}}-p_{\bar{\mathbf{w}}})^2}{p_{\mathbf{w}}+p_{\bar{\mathbf{w}}}} \right) \\
 &= \lim_{n \rightarrow \infty} \sum \frac{(P_{\rho}(\mathbf{w})+P_{\rho}(\bar{\mathbf{w}})-p_{\mathbf{w}}-p_{\bar{\mathbf{w}}})}{p_{\mathbf{w}}+p_{\bar{\mathbf{w}}}} \sqrt{M} \left( \frac{X_{\mathbf{w}}}{M} - (\beta-k+1)(P_{\rho}(\mathbf{w})+P_{\rho}(\bar{\mathbf{w}})) \right. \\
 &\quad \left. + \frac{Y_{\mathbf{w}}}{M} - (\beta-k+1)(P_{\rho}(\mathbf{w})+P_{\rho}(\bar{\mathbf{w}})) \right).
 \end{aligned}$$

So the expression has a normal distribution with mean 0 and variance  $2(\Sigma_{\rho}^*)^2$ , where  $\Sigma_{\rho}^*$  is given in the main text of Theorem 3. The theorem is proved.

#### Proof of Theorem 4:

a). The proof of this part is similar to the proof of the first part of Theorem 3 and is omitted here.

b). For this part, using Taylor expansion, it is straightforward to show that for any  $a \neq 0$  and  $(x, y)$  in the neighborhood of  $(0, 0)$ ,

$$\frac{(x+a)(y+a)}{\sqrt{(x+a)^2+(y+a)^2}} = \frac{|a|}{\sqrt{2}} + \frac{\text{sign}(a)}{2\sqrt{2}}(x+y) + O(x^2+y^2).$$

For each word  $\mathbf{w}$ , let  $a = (\beta-k+1)(P_{\rho}(\mathbf{w})+P_{\rho}(\bar{\mathbf{w}})-p_{\mathbf{w}}-p_{\bar{\mathbf{w}}})$ ,  $x = \frac{X_{\mathbf{w}}}{M} - (\beta-k+1)(P_{\rho}(\mathbf{w})+P_{\rho}(\bar{\mathbf{w}}))$ , and  $y = \frac{Y_{\mathbf{w}}}{M} - (\beta-k+1)(P_{\rho}(\mathbf{w})+P_{\rho}(\bar{\mathbf{w}}))$ . Then, with the Taylor expansion,

$$\begin{aligned}
 \frac{\tilde{X}_{\mathbf{w}}\tilde{Y}_{\mathbf{w}}}{M\sqrt{\tilde{X}_{\mathbf{w}}^2+\tilde{Y}_{\mathbf{w}}^2}} &= \frac{(\beta-k+1)|P_{\rho}(\mathbf{w})+P_{\rho}(\bar{\mathbf{w}})-p_{\mathbf{w}}-p_{\bar{\mathbf{w}}}|}{\sqrt{2}} \\
 &\quad + \frac{\text{sign}(P_{\rho}(\mathbf{w})+P_{\rho}(\bar{\mathbf{w}})-p_{\mathbf{w}}-p_{\bar{\mathbf{w}}})}{2\sqrt{2}} \left( \frac{X_{\mathbf{w}}}{M} - (\beta-k+1)(P_{\rho}(\mathbf{w})+P_{\rho}(\bar{\mathbf{w}})) \right. \\
 &\quad \left. + \frac{Y_{\mathbf{w}}}{M} - (\beta-k+1)(P_{\rho}(\mathbf{w})+P_{\rho}(\bar{\mathbf{w}})) \right) \\
 &\quad + O\left( \left( \frac{X_{\mathbf{w}}}{M} - (\beta-k+1)(P_{\rho}(\mathbf{w})+P_{\rho}(\bar{\mathbf{w}})) \right)^2 + \left( \frac{Y_{\mathbf{w}}}{M} - (\beta-k+1)(P_{\rho}(\mathbf{w})+P_{\rho}(\bar{\mathbf{w}})) \right)^2 \right).
 \end{aligned}$$

Taking expectations we obtain that

$$\begin{aligned}
 \mathbf{E}_{\rho} \left( \frac{\tilde{X}_{\mathbf{w}}\tilde{Y}_{\mathbf{w}}}{M\sqrt{\tilde{X}_{\mathbf{w}}^2+\tilde{Y}_{\mathbf{w}}^2}} \right) &= \frac{(\beta-k+1)|P_{\rho}(\mathbf{w})+P_{\rho}(\bar{\mathbf{w}})-p_{\mathbf{w}}-p_{\bar{\mathbf{w}}}|}{\sqrt{2}} \\
 &\quad + O\left( \mathbf{E}_{\rho} \left( \frac{X_{\mathbf{w}}}{M} - (\beta-k+1)(P_{\rho}(\mathbf{w})+P_{\rho}(\bar{\mathbf{w}})) \right)^2 + \mathbf{E}_{\rho} \left( \frac{Y_{\mathbf{w}}}{M} - (\beta-k+1)(P_{\rho}(\mathbf{w})+P_{\rho}(\bar{\mathbf{w}})) \right)^2 \right).
 \end{aligned}$$

As  $E_\rho\left(\frac{X_{\mathbf{w}}}{M} - (\beta - k + 1)(P_\rho(\mathbf{w}) + P_\rho(\bar{\mathbf{w}}))\right)^2 = \frac{1}{M} \text{Var}_\rho\left(\frac{X_{\mathbf{w}}}{\sqrt{M}}\right) = O(M^{-1})$ , we obtain that the asymptotic mean of  $\frac{\tilde{X}_{\mathbf{w}}\tilde{Y}_{\mathbf{w}}}{M\sqrt{\tilde{X}_{\mathbf{w}}^2 + \tilde{Y}_{\mathbf{w}}^2}}$  equals  $(\beta - k + 1)|P_\rho(\mathbf{w}) + P_\rho(\bar{\mathbf{w}}) - p_{\mathbf{w}} - p_{\bar{\mathbf{w}}}|/\sqrt{2}$ . Moreover, we have

$$\begin{aligned} & \sqrt{M}\left(\frac{D_2^S}{M} - (\beta - k + 1)\sum\frac{|P_\rho(\mathbf{w}) + P_\rho(\bar{\mathbf{w}}) - p_{\mathbf{w}} - p_{\bar{\mathbf{w}}}|}{\sqrt{2}}\right) \\ &= \sqrt{M}\sum\left(\frac{\tilde{X}_{\mathbf{w}}\tilde{Y}_{\mathbf{w}}}{M\sqrt{\tilde{X}_{\mathbf{w}}^2 + \tilde{Y}_{\mathbf{w}}^2}} - (\beta - k + 1)\frac{|P_\rho(\mathbf{w}) + P_\rho(\bar{\mathbf{w}}) - p_{\mathbf{w}} - p_{\bar{\mathbf{w}}}|}{\sqrt{2}}\right) \\ &= \sum\frac{\text{sign}(P_\rho(\mathbf{w}) + P_\rho(\bar{\mathbf{w}}) - p_{\mathbf{w}} - p_{\bar{\mathbf{w}}})}{2\sqrt{2}}\sqrt{M}\left(\frac{X_{\mathbf{w}}}{M} - (\beta - k + 1)(P_\rho(\mathbf{w}) + P_\rho(\bar{\mathbf{w}})) + \frac{Y_{\mathbf{w}}}{M} - (\beta - k + 1)(P_\rho(\mathbf{w}) + P_\rho(\bar{\mathbf{w}}))\right) \\ &+ \frac{1}{\sqrt{M}}\sum O\left(M\left(\frac{X_{\mathbf{w}}}{M} - (\beta - k + 1)(P_\rho(\mathbf{w}) + P_\rho(\bar{\mathbf{w}}))\right)^2 + M\left(\frac{Y_{\mathbf{w}}}{M} - (\beta - k + 1)(P_\rho(\mathbf{w}) + P_\rho(\bar{\mathbf{w}}))\right)^2\right). \end{aligned}$$

Similar to the proof of Theorem 3, we see that  $\sqrt{M}\left(\frac{D_2^S}{M} - (\beta - k + 1)\sum\frac{|P_\rho(\mathbf{w}) + P_\rho(\bar{\mathbf{w}}) - p_{\mathbf{w}} - p_{\bar{\mathbf{w}}}|}{\sqrt{2}}\right)$  is asymptotically normal with mean 0 and variance  $2(\Sigma_\rho^S)^2$ .

### Proof of Theorem 5:

The proof of the three equation are roughly the same, and thus we only give the proof for the first equation. We consider one-sided test. For fixed type I error  $\alpha$ , based on Theorem 2 (a), we find  $z_\alpha$  such that  $P\{Z_1 \geq z_\alpha\} = \alpha$ . We reject the null hypothesis if  $Z_1 \geq z_\alpha$  which is approximately equivalent to  $D_2 > M^2(\beta - k + 1)^2 A(1) + z_\alpha \sqrt{M^3}$ . Thus, the power for  $D_2$  is approximately

$$\begin{aligned} 1 - \beta &= P_\rho(D_2 > M^2(\beta - k + 1)^2 A(1) + z_\alpha \sqrt{M^3}) \\ &= P_\rho\left(\frac{\sqrt{M}\left(\frac{D_2}{M^2} - (\beta - k + 1)^2 A(\rho)\right)}{\sqrt{2}\Sigma_\rho} > \frac{\sqrt{M}\left(\frac{z_\alpha}{\sqrt{M}} - (\beta - k + 1)^2(A(\rho) - A(1))\right)}{\sqrt{2}\Sigma_\rho}\right) \\ &\approx 1 - \Phi(C(\rho)), \end{aligned}$$

where  $A(\rho) = \sum_{\mathbf{w} \in \mathcal{A}^k} (P_\rho(\mathbf{w}) + P_\rho(\bar{\mathbf{w}}))^2$ . The last approximation holds because of Theorem 2 (b).

## Supplementary Figures

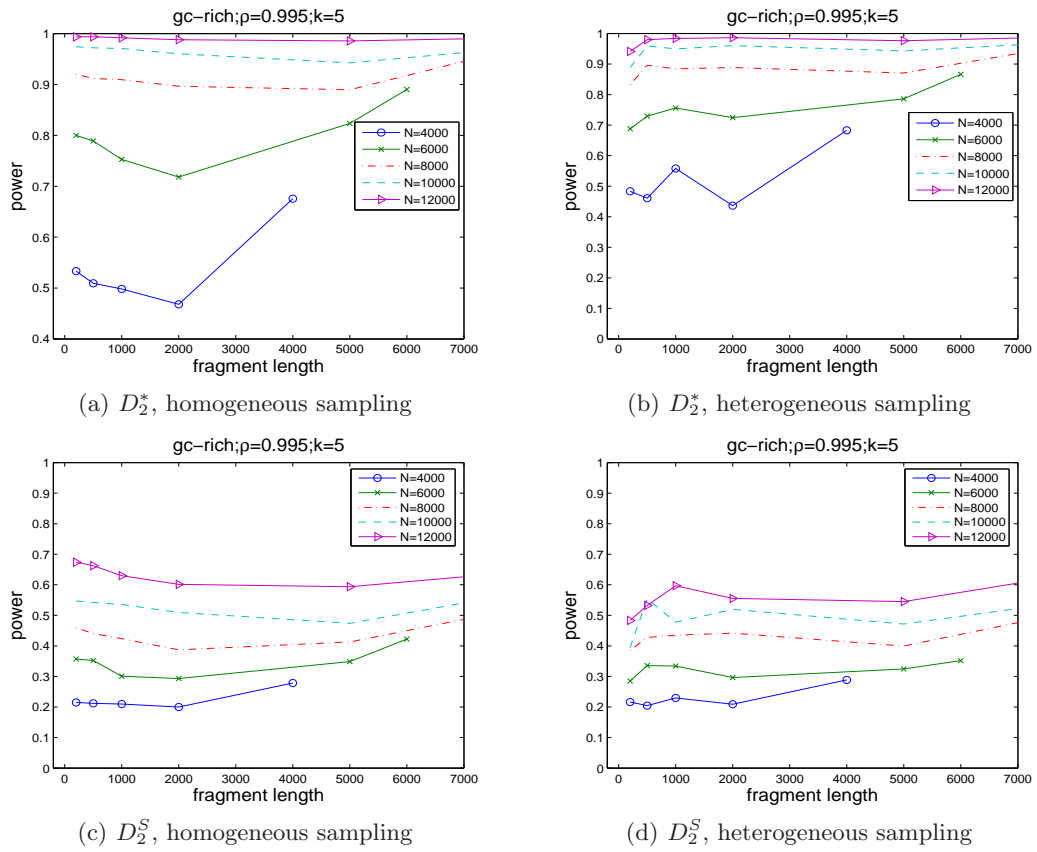

**Fig. 1. (Supplementary Figure S1).** The power of  $D_2^*$  (a,b), and  $D_2^S$  (c,d) under the homogeneous (left column) and the heterogeneous (right column) NGS read sampling as a function of sequence length and read length  $\beta$ . Here GC-rich distribution,  $\rho = 0.99$ ,  $k = 5$ , and  $\beta = 200$ .

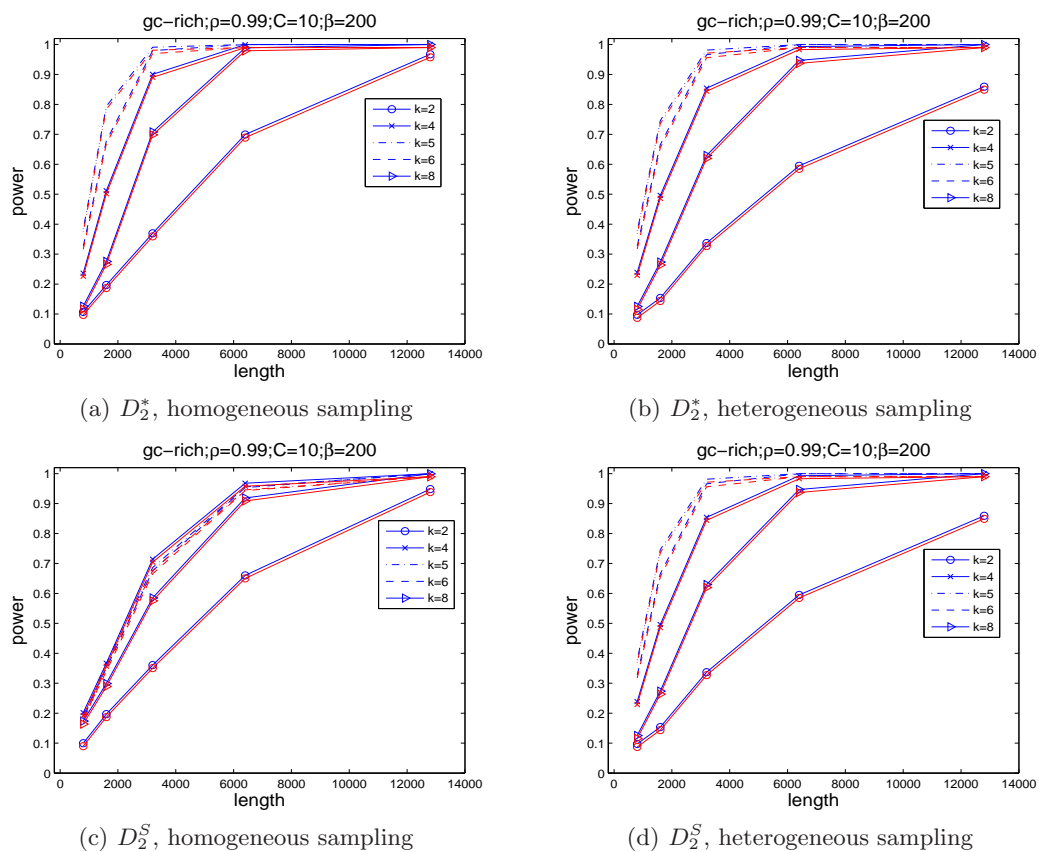

**Fig. 2. (Supplementary Figure S2).** The power of  $D_2^*$  (a,b), and  $D_2^S$  (c,d) under the homogeneous (left column) and the heterogeneous (right column) NGS read sampling as a function of sequence length and with/without sequencing errors. Here GC-rich distribution,  $\rho = 0.99$ ,  $k = 5$ , and  $\beta = 200$ .



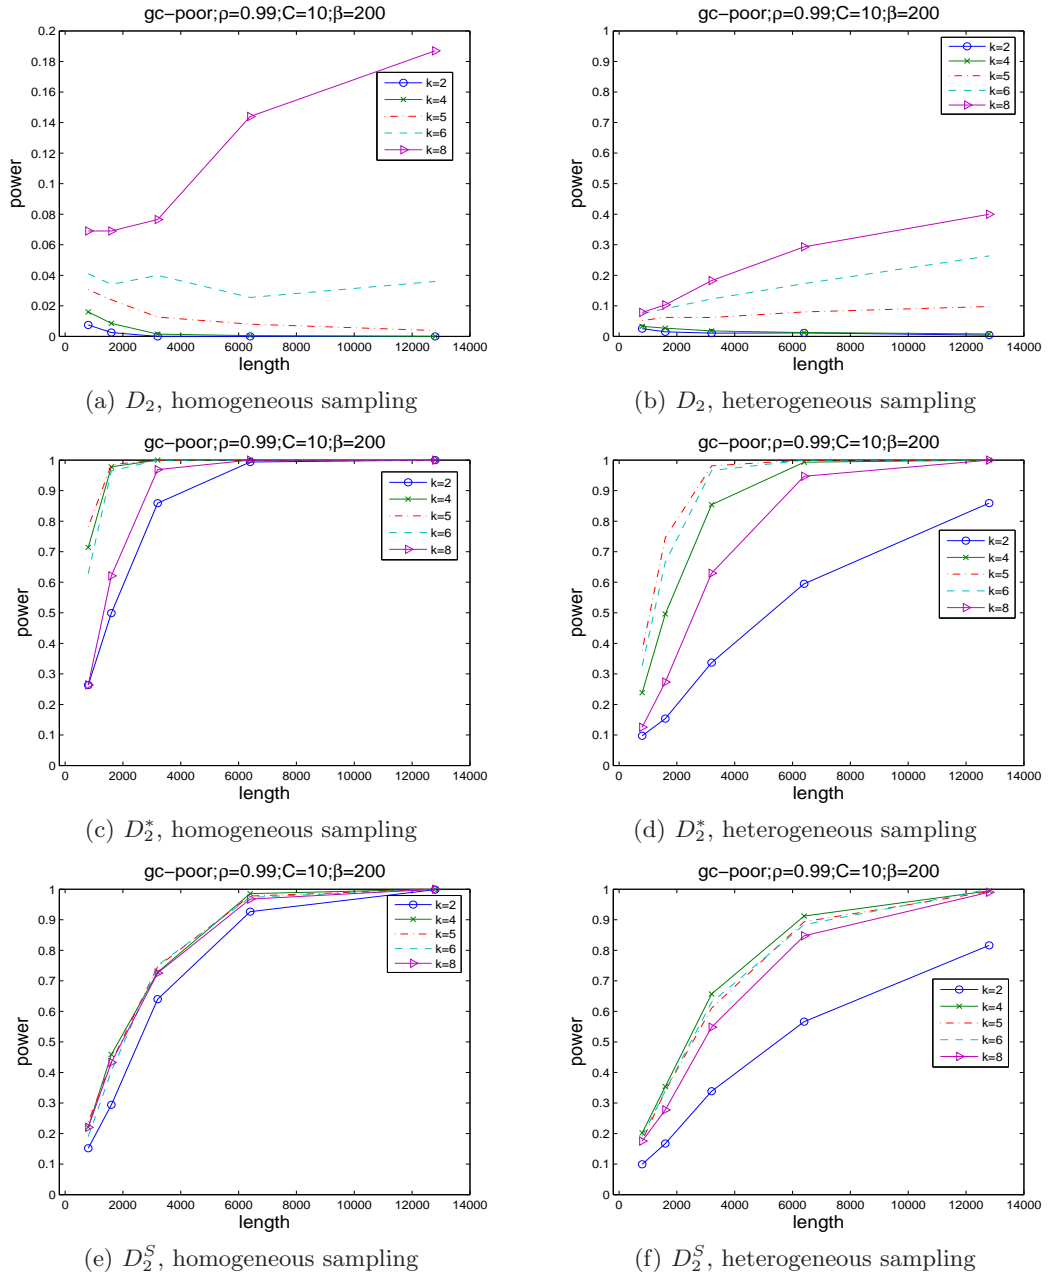

**Fig. 3. (Supplementary Figure S3).** The power of  $D_2$ (a,b),  $D_2^*$ (c,d), and  $D_2^S$ (e,f) under the homogeneous (left column) and the heterogeneous (right column) NGS read sampling as a function of sequence length and word size  $k$ . Here GC-poor distribution:  $\rho = 0.99$ , coverage = 10 and  $\beta = 200$ .

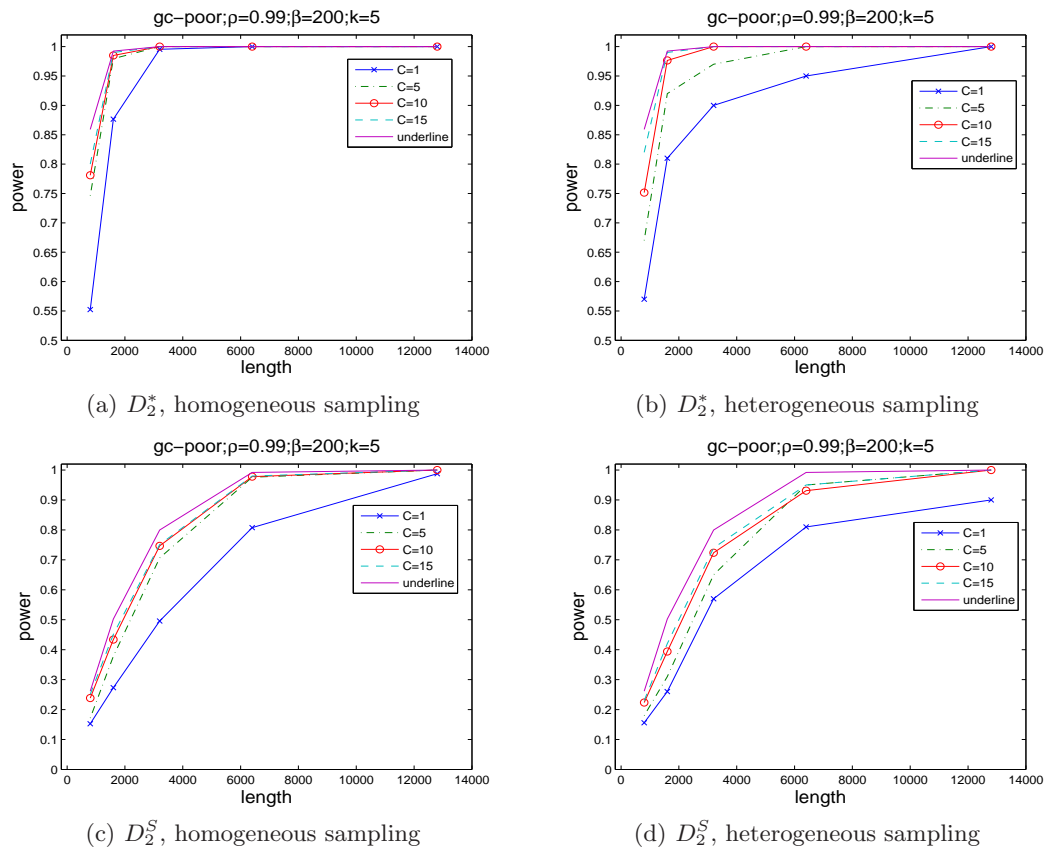

**Fig. 4. (Supplementary Figure S4).** The power of  $D_2^*$  (a,b), and  $D_2^S$  (c,d) under the homogeneous (left column) and the heterogeneous (right column) NGS read sampling as a function of sequence length and coverage. For comparison, the power of the statistics when the whole genome sequences are known is also shown (underline). Here GC-poor distribution,  $\rho = 0.99$ ,  $k = 5$ , and  $\beta = 200$ .

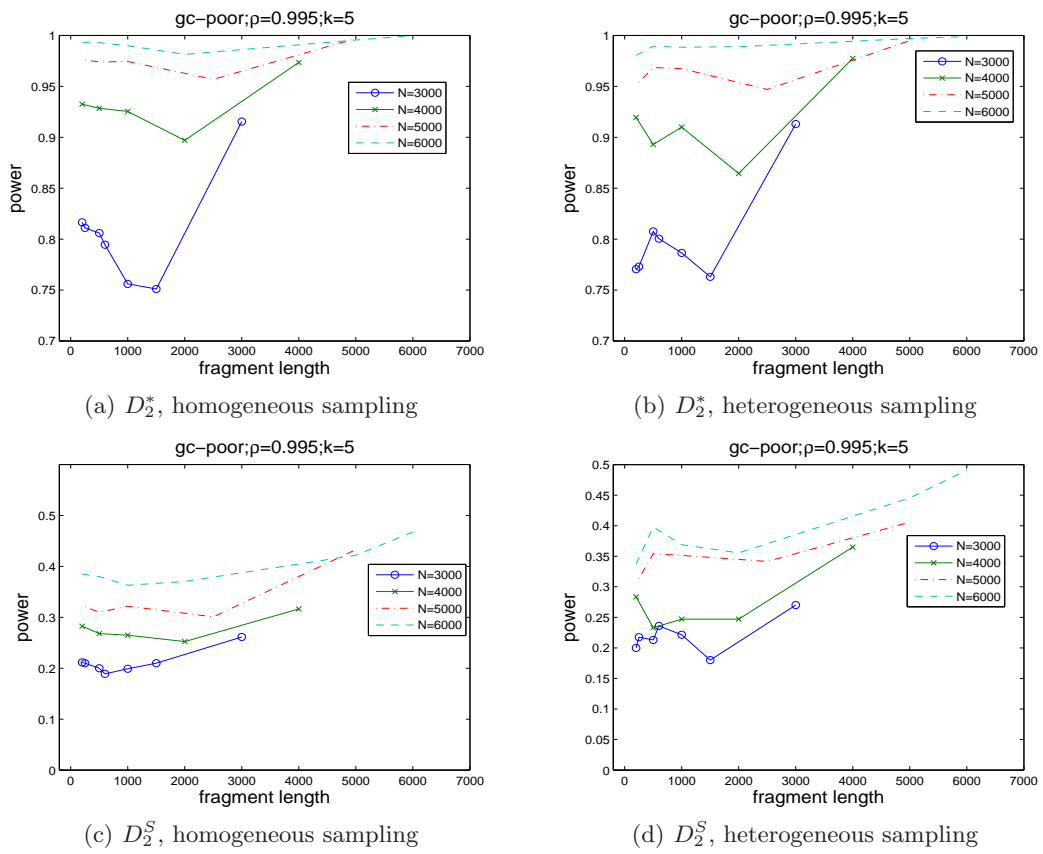

**Fig. 5. (Supplementary Figure S5).** The power of  $D_2^*$  (a,b), and  $D_2^S$  (c,d) under the homogeneous (left column) and the heterogeneous (right column) NGS read sampling as a function of sequence length and read length  $\beta$ . Here GC-poor distribution,  $\rho = 0.99$ ,  $k = 5$ , and  $\beta = 200$ .

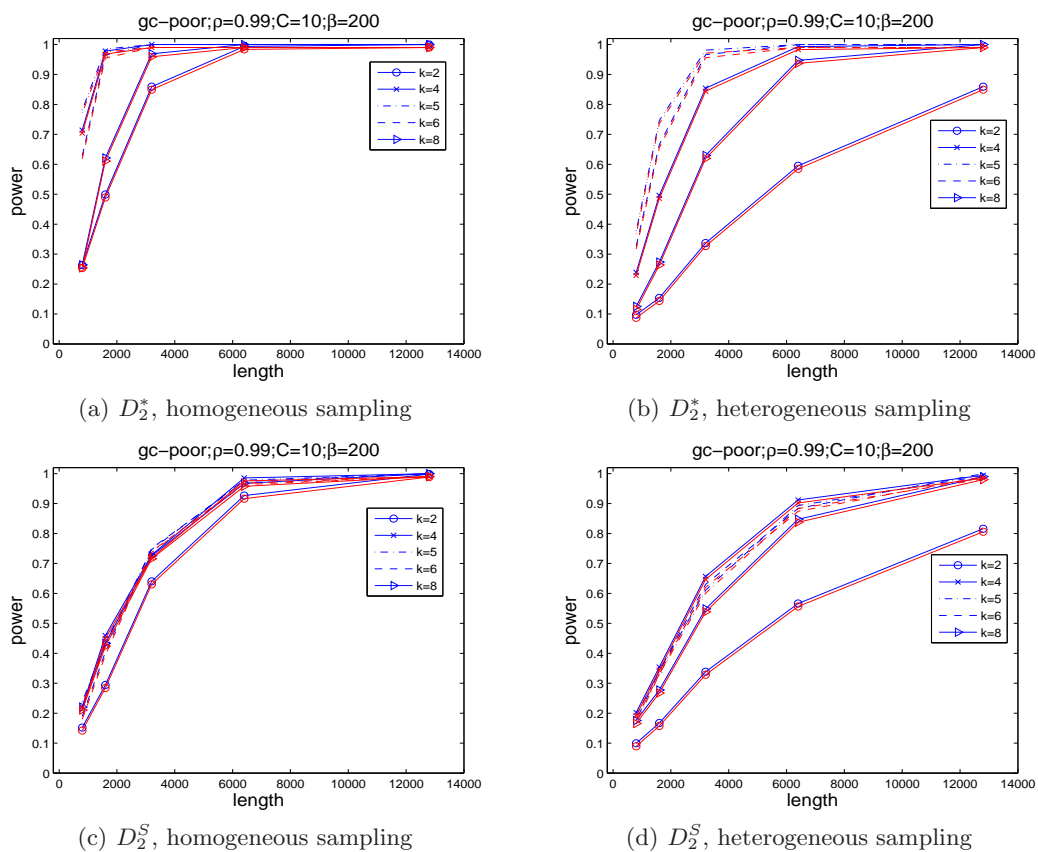

**Fig. 6. (Supplementary Figure S6).** The power of  $D_2^*$  (a,b), and  $D_2^S$  (c,d) under the homogeneous (left column) and the heterogeneous (right column) NGS read sampling as a function of sequence length and with/without sequencing errors. Here GC-poor distribution,  $\rho = 0.99$ ,  $k = 5$ , and  $\beta = 200$ .

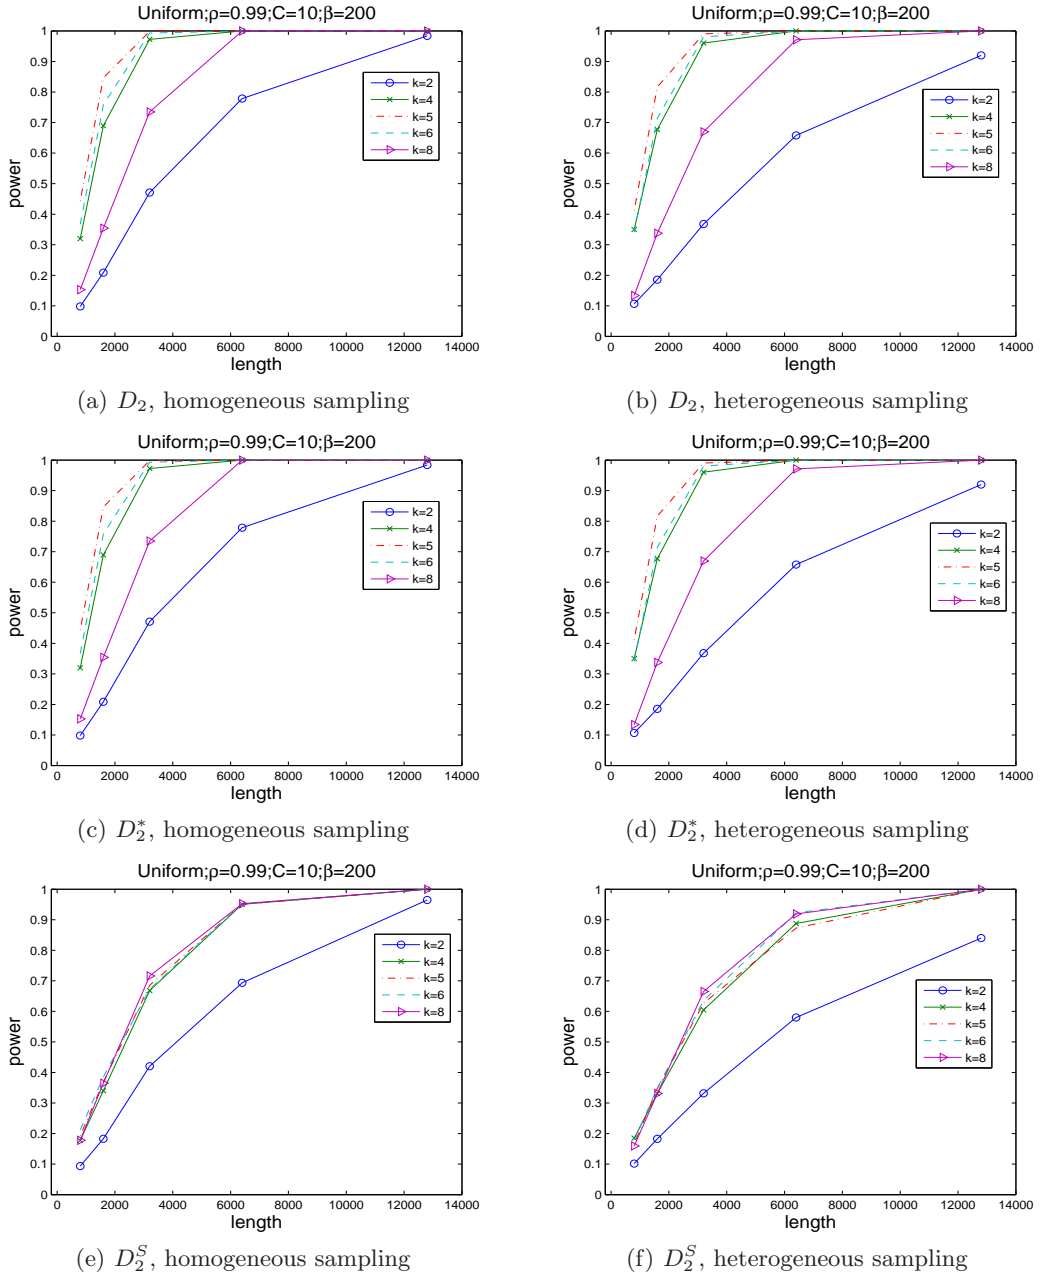

**Fig. 7. (Supplementary Figure S7).** The power of  $D_2$ (a,b),  $D_2^*$ (c,d), and  $D_2^S$ (e,f) under the homogeneous (left column) and the heterogeneous (right column) NGS read sampling as a function of sequence length and word size  $k$ . Here uniform distribution:  $\rho = 0.99$ , coverage = 10 and  $\beta = 200$ .

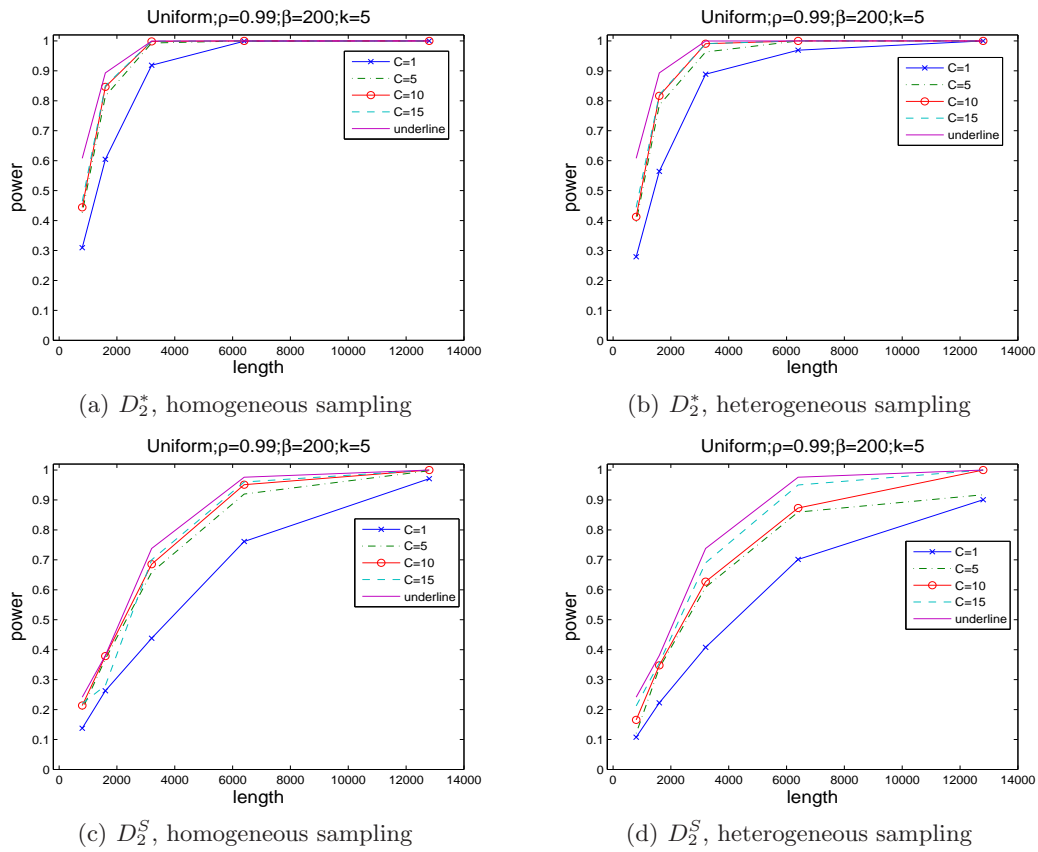

**Fig. 8. (Supplementary Figure S8).** The power of  $D_2^*$  (a,b), and  $D_2^S$  (c,d) under the homogeneous (left column) and the heterogeneous (right column) NGS read sampling as a function of sequence length and coverage. For comparison, the power of the statistics when the whole genome sequences are known is also shown (underline). Here uniform distribution,  $\rho = 0.99$ ,  $k = 5$ , and  $\beta = 200$ .

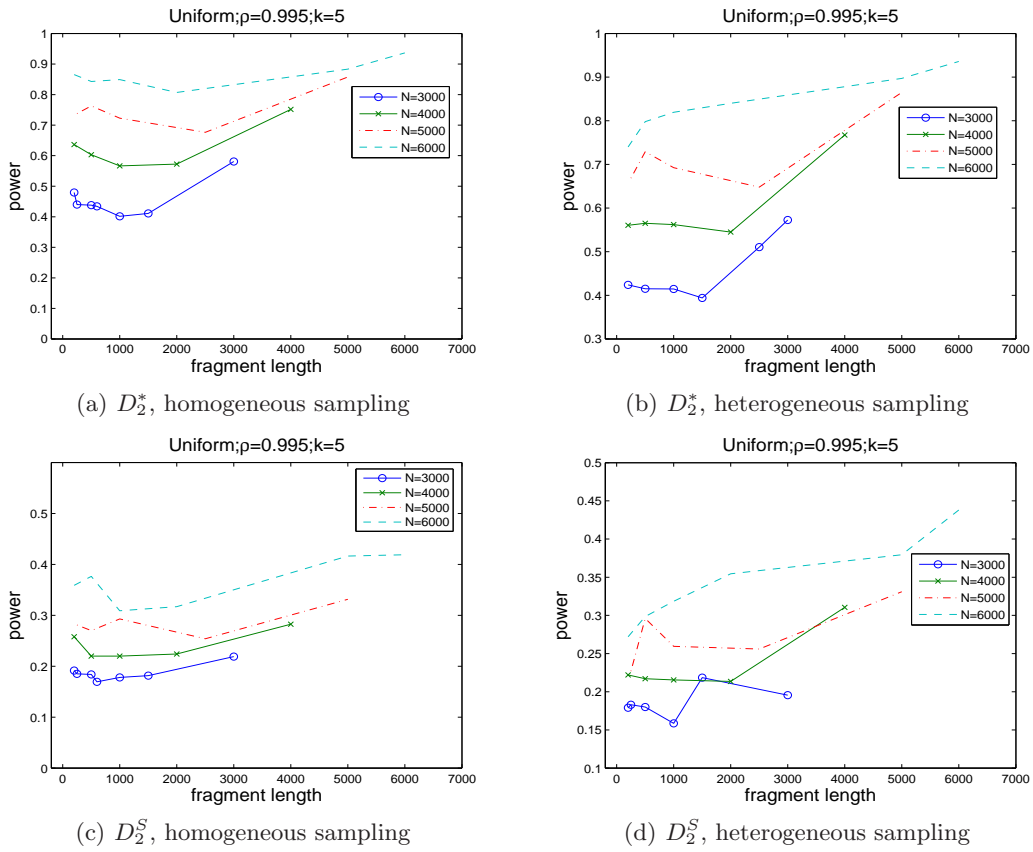

**Fig. 9. (Supplementary Figure S9).** The power of  $D_2^*$  (a,b), and  $D_2^S$  (c,d) under the homogeneous (left column) and the heterogeneous (right column) NGS read sampling as a function of sequence length and read length  $\beta$ . Here uniform distribution,  $\rho = 0.99$ ,  $k = 5$ , and  $\beta = 200$ .

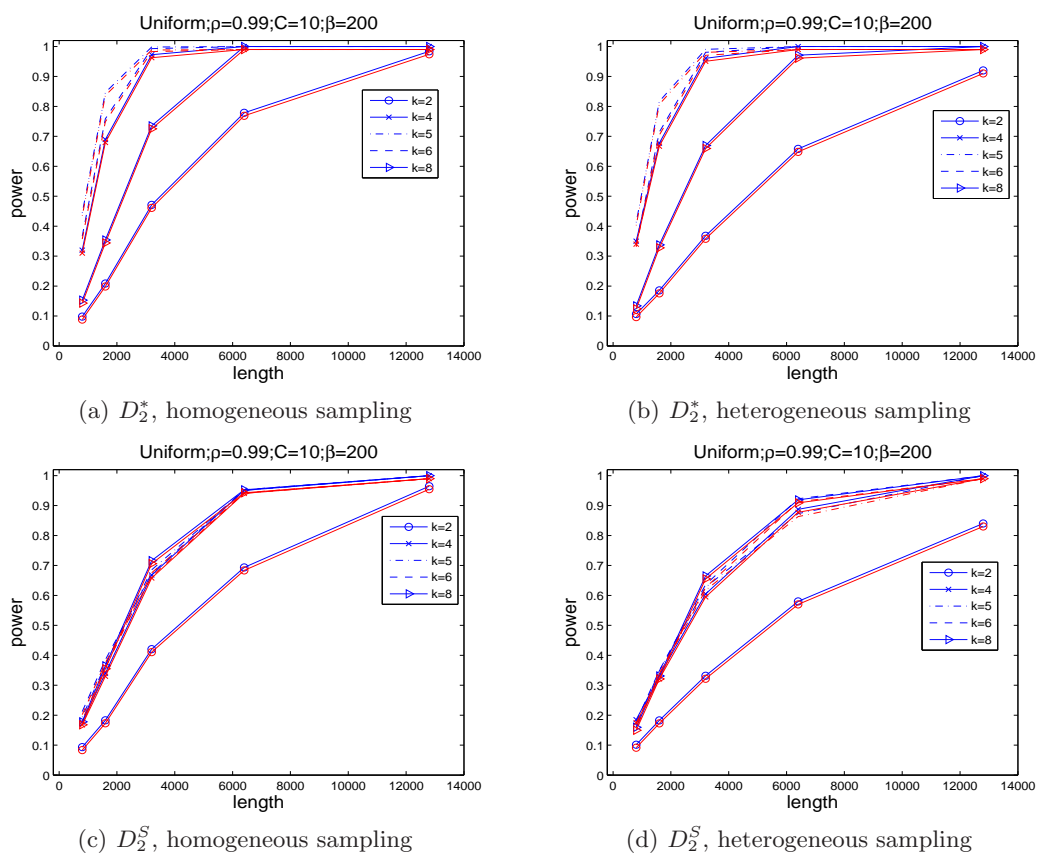

**Fig. 10. (Supplementary Figure S10).** The power of  $D_2^*$  (a,b), and  $D_2^S$  (c,d) under the homogeneous (left column) and the heterogeneous (right column) NGS read sampling as a function of sequence length and with/without sequencing errors. Here uniform distribution,  $\rho = 0.99$ ,  $k = 5$ , and  $\beta = 200$ .



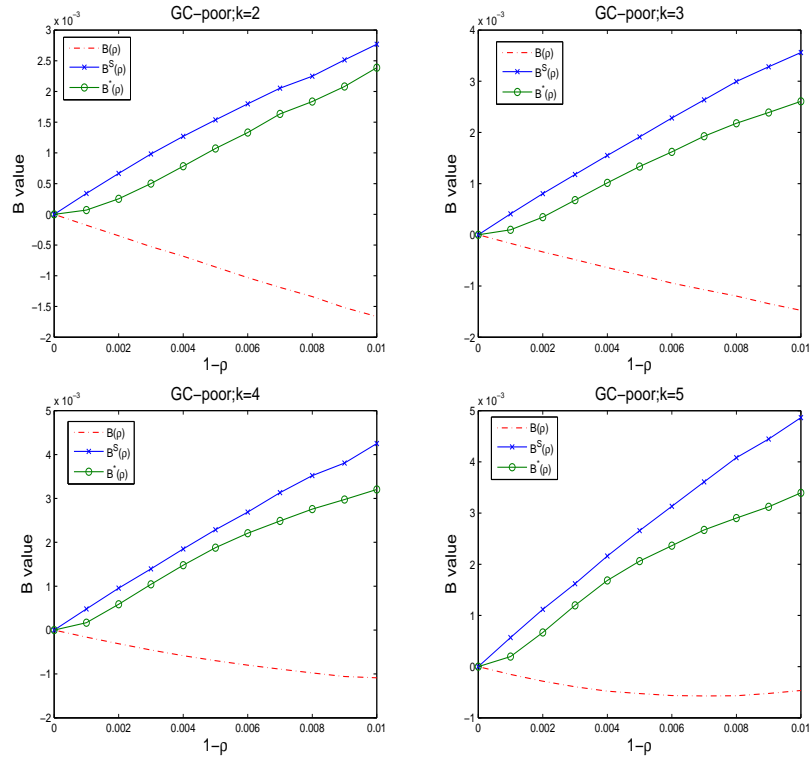

**Fig. 11. (Supplementary Figure S11).** The values of  $B(\rho)$ ,  $B^*(\rho)$  and  $B^S(\rho)$  as a function of  $1 - \rho$  from 0 to 0.01 for the GC-poor background distribution and  $\beta = 200$  under homogeneous read sampling.

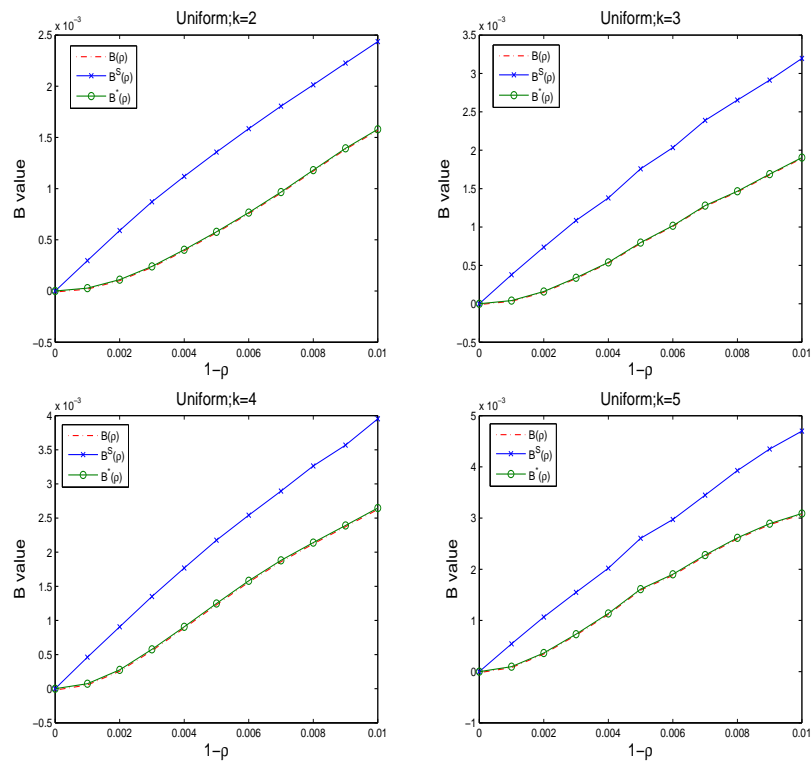

**Fig. 12. (Supplementary Figure S12).** The values of  $B(\rho)$ ,  $B^*(\rho)$  and  $B^S(\rho)$  as a function of  $1 - \rho$  from 0 to 0.01 for the uniform background distribution and  $\beta = 200$  under homogeneous read sampling.

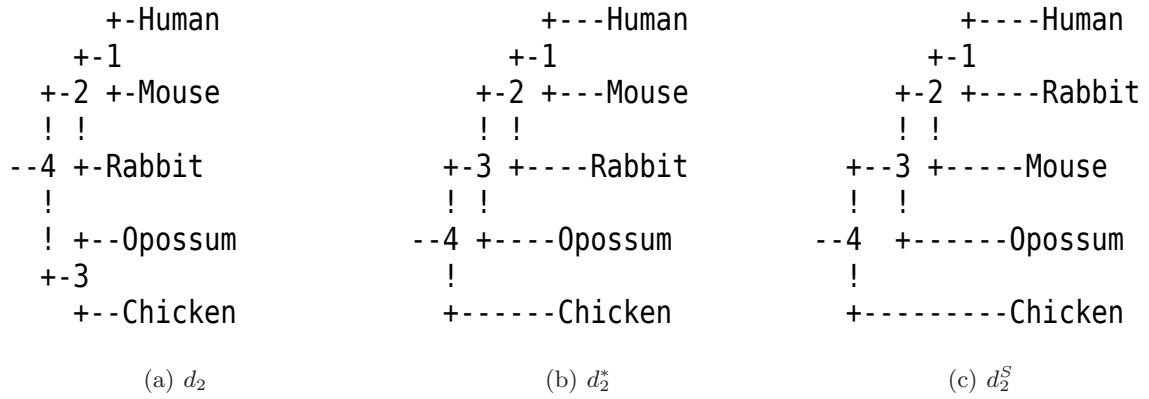

**Fig. 13. (Supplementary Figure S13).** The clusterings of the five mammalian species with dissimilarity measures, from left to right  $d_2$ (a),  $d_2^*$ (b), and  $d_2^S$ (c) with  $k = 7$  using only the reads with  $X_w/EX_w \leq 2$ .

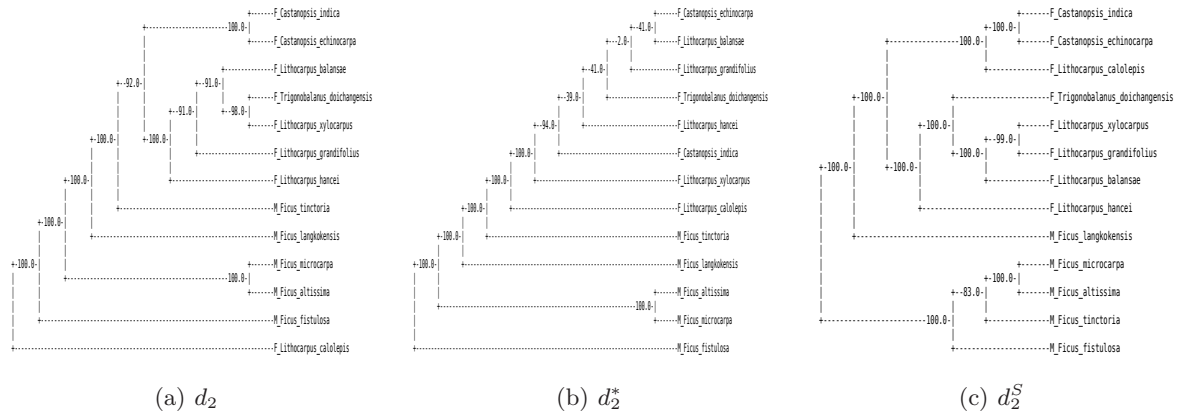

**Fig. 14. (Supplementary Figure S14).** The clusterings of the 13 tree species with dissimilarity measures, from left to right  $d_2$ (a),  $d_2^*$ (b), and  $d_2^S$ (c) with  $k = 7$  using all the reads. The number on each internal branch is the fraction of times the branch occurs in 100 random sampling using  $d = 5\%$  of the reads.

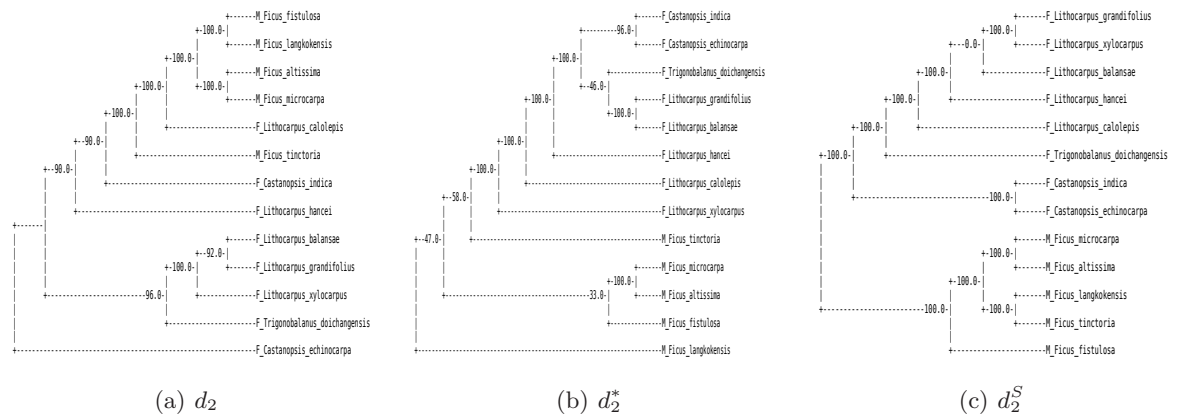

**Fig. 15. (Supplementary Figure S15).** The clusterings of the 13 tree species with dissimilarity measures, from left to right  $d_2$ (a),  $d_2^*$ (b), and  $d_2^S$ (c) with  $k = 11$  using all the reads. The number on each internal branch is the fraction of times the branch occurs in 100 random sampling using  $d = 5\%$  of the reads.

## Supplementary Tables

| $n \times 10^{-4}$ | $D_2$                                                      |                               | $D_2^*$                                                  |                                 | $D_2^S$                                                    |                                 |
|--------------------|------------------------------------------------------------|-------------------------------|----------------------------------------------------------|---------------------------------|------------------------------------------------------------|---------------------------------|
|                    | $\frac{\mathbf{E}ND_2 \times 10^3}{\sqrt{M(\beta-k+1)^2}}$ | $\sigma(ND_2) \times 10^{-5}$ | $\frac{\mathbf{E}ND_2^* \times 10}{\sqrt{M(\beta-k+1)}}$ | $\sigma(ND_2^*) \times 10^{-2}$ | $\frac{\mathbf{E}ND_2^S \times 10^2}{\sqrt{M(\beta-k+1)}}$ | $\sigma(ND_2^S) \times 10^{-2}$ |
| 0.32               | 6.50                                                       | 8.65                          | 3.17                                                     | 3.25                            | 5.86                                                       | 6.02                            |
| 0.64               | 6.50                                                       | 8.92                          | 3.15                                                     | 2.72                            | 6.23                                                       | 6.63                            |
| 1.28               | 6.50                                                       | 8.62                          | 3.16                                                     | 2.54                            | 6.89                                                       | 7.14                            |
| 2.56               | 6.50                                                       | 8.54                          | 3.15                                                     | 2.54                            | 7.67                                                       | 7.32                            |
| 10                 | 6.50                                                       | 8.17                          | 3.15                                                     | 2.34                            | 9.51                                                       | 7.67                            |
| 20                 | 6.50                                                       | 8.32                          | 3.15                                                     | 2.22                            | 9.61                                                       | 7.92                            |
| Theory             | 6.50                                                       | 8.45                          | 3.15                                                     | 2.09                            | 13.66                                                      | 8.28                            |

**Table 1. (Supplementary Table S1).** Comparison of simulated means and variances of  $ND_2, ND_2^*$ , and  $ND_2^S$  for different sequence length  $n$  with the corresponding theoretical limits, with GC-poor background and motif=AGCCA,  $C = 1, \rho = 0.99$  and for the expectation, word length  $k = 5$ , and for the covariance, word length  $k = 2$ . The number of simulations is 10,000.

| $n \times 10^{-4}$ | $D_2$  |           | $D_2^*$ |           | $D_2^S$ |           |
|--------------------|--------|-----------|---------|-----------|---------|-----------|
|                    | Theory | Simulated | Theory  | Simulated | Theory  | Simulated |
| 0.1                | 1.1    | 3.3       | 69.5    | 67.3      | 53.4    | 17.3      |
| 0.2                | 1.4    | 2.5       | 90.0    | 92.4      | 89.0    | 27.9      |
| 0.32               | 1.1    | 1.6       | 98.0    | 99.5      | 98.8    | 49.6      |
| 0.4                | 0.8    | 1.5       | 99.4    | 99.9      | 99.5    | 59.0      |
| 0.5                | 1.1    | 1.4       | 100     | 100       | 99.7    | 72.2      |
| 0.64               | 1.1    | 1.3       | 100     | 100       | 99.9    | 90.8      |
| 1.28               | 0.6    | 0.7       | 100     | 100       | 99.9    | 98.4      |

**Table 2. (Supplementary Table S2).** Comparison of the theoretical and the simulated power for  $D_2, D_2^*$  and  $D_2^S$  for different sequence length  $n$  with GC-poor background and motif=AGCCA,  $C = 1, \rho = 0.99$  and word length  $k = 5$ . The type I error  $\alpha = 0.05$ . The number of simulations is 10,000.

| $n \times 10^{-4}$ | $D_2$                                                      |                               | $D_2^*$                                                  |                                 | $D_2^S$                                                    |                  |
|--------------------|------------------------------------------------------------|-------------------------------|----------------------------------------------------------|---------------------------------|------------------------------------------------------------|------------------|
|                    | $\frac{\mathbf{E}ND_2 \times 10^3}{\sqrt{M(\beta-k+1)^2}}$ | $\sigma(ND_2) \times 10^{-3}$ | $\frac{\mathbf{E}ND_2^* \times 10}{\sqrt{M(\beta-k+1)}}$ | $\sigma(ND_2^*) \times 10^{-2}$ | $\frac{\mathbf{E}ND_2^S \times 10^2}{\sqrt{M(\beta-k+1)}}$ | $\sigma(ND_2^S)$ |
| 0.32               | 4.20                                                       | 9.53                          | 1.51                                                     | 5.44                            | 5.04                                                       | 15.40            |
| 0.64               | 4.20                                                       | 7.01                          | 1.51                                                     | 6.15                            | 5.48                                                       | 11.33            |
| 1.28               | 4.20                                                       | 5.59                          | 1.50                                                     | 6.83                            | 6.01                                                       | 9.04             |
| 2.56               | 4.20                                                       | 4.68                          | 1.50                                                     | 6.95                            | 6.75                                                       | 7.57             |
| 10                 | 4.20                                                       | 4.35                          | 1.50                                                     | 7.62                            | 8.46                                                       | 7.32             |
| 20                 | 4.20                                                       | 4.22                          | 1.50                                                     | 7.93                            | 8.61                                                       | 7.11             |
| Theory             | 4.20                                                       | 4.11                          | 1.50                                                     | 8.31                            | 12.80                                                      | 6.10             |

**Table 3. (Supplementary Table S3).** Comparison of simulated mean and variance of  $ND_2, ND_2^*$ , and  $ND_2^S$  for different sequence length  $n$  with the corresponding theoretical limits, with uniform background and motif=AGCCA,  $C = 1, \rho = 0.99$  and for the expectation, word length  $k = 5$ , and for the covariance, word length  $k = 2$ . The number of simulations is 10,000.

| $n \times 10^{-4}$ | $D_2$  |           | $D_2^*$ |           | $D_2^S$ |           |
|--------------------|--------|-----------|---------|-----------|---------|-----------|
|                    | Theory | Simulated | Theory  | Simulated | Theory  | Simulated |
| 0.1                | 35.1   | 35.5      | 35.1    | 35.5      | 54.2    | 12.1      |
| 0.2                | 71.7   | 68.2      | 71.7    | 68.2      | 90.9    | 27.2      |
| 0.32               | 90.1   | 91.9      | 90.1    | 91.9      | 98.3    | 41.1      |
| 0.4                | 94.4   | 95.9      | 94.4    | 95.9      | 99.7    | 48.5      |
| 0.5                | 97.7   | 99.4      | 97.7    | 99.4      | 99.9    | 63.0      |
| 0.64               | 99.2   | 99.9      | 99.2    | 99.9      | 99.9    | 74.8      |
| 1.28               | 100    | 100       | 100     | 100       | 100     | 96.6      |

**Table 4. (Supplementary Table S4).** Comparison of the theoretical and the simulated power for  $D_2, D_2^*$  and  $D_2^S$  for different sequence length  $n$  with uniform background and motif=AGCCA,  $C = 1, \rho = 0.99$  and word length  $k = 5$ . The type I error  $\alpha = 0.05$ . The number of simulations is 10,000.

| Group     | Species Name                   | SRA accession No. |
|-----------|--------------------------------|-------------------|
| Fagaceae: | 1 Lithocarpus balansae         | SRR035946         |
|           | 2 Lithocarpus grandifolius     | SRR037157         |
|           | 3 Lithocarpus hancei           | SRR037158         |
|           | 4 Lithocarpus xylocarpus       | SRR037437         |
|           | 5 Lithocarpus calolepis        | SRR037484         |
|           | 6 Trigonobalanus doichangensis | SRR037802         |
|           | 7 Castanopsis echinocarpa      | SRR037535         |
|           | 8 Castanopsis indica           | SRR037537         |
| Moraceae: | 1 Ficus altissima              | SRR037748         |
|           | 2 Ficus langkokensis           | SRR037751         |
|           | 3 Ficus microcarpa             | SRR037888         |
|           | 4 Ficus tinctoria              | SRR038268         |
|           | 5 Ficus fistulosa              | SRR035147         |

**Table 5. (Supplementary Table S5).** The names of the 13 tree species and their NCBI short read archive (SRA) accession numbers.
